*Title:* Estimating energy expenditure from wrist and thigh accelerometry in free-living adults:  
a doubly labelled water study

*Author names:* Tom White, Kate Westgate, Stefanie Hollidge, Michelle Venables, Patrick Olivier, Nick Wareham, Soren Brage

*Author affiliations:* MRC Epidemiology Unit, School of Clinical Medicine, University of Cambridge, Cambridge, United Kingdom (TW, KW, SH, NW, SB)

MRC Elsie Widdowson Laboratory, 20 Fulbourn Road, Cambridge, United Kingdom (MV)

Open Lab, School of Computing, Newcastle University, Newcastle upon Tyne, United Kingdom (PO)

*Corresponding Author:* Soren Brage, MRC Epidemiology Unit, University of Cambridge, Institute of Metabolic Science, Addenbrooke's Biomedical Campus, Cambridge CB2 0QQ, United Kingdom; +44 1223 769116; [soren.brage@mrc-epid.cam.ac.uk](mailto:soren.brage@mrc-epid.cam.ac.uk)

*Sources of Support:* Medical Research Council (<http://www.mrc.ac.uk/>) grants MC\_UU\_12015/1 and MC\_UU\_12015/3 to NW and SB, studentship from MedImmune to TW. Medical Research Council, UK Biobank, MedImmune and Newcastle University strategic funding for Digital Civics covered the costs of the field work.

*Short running head:* Energy expenditure from body-worn sensors

- 1 *Abbreviations list:* Activity Energy Expenditure (AEE), Doubly-Labelled Water (DLW), Diet-
- 2 Induced Thermogenesis (DIT), Euclidean Norm Minus One (ENMO), Food Quotient (FQ),
- 3 Food Frequency Questionnaire (FFQ), High-pass Filtered Vector Magnitude (HPFVM),
- 4 Resting Energy Expenditure (REE), Total Energy Expenditure (TEE), Vector Magnitude
- 5 (VM).

6

7 **Abstract**

8 Background: Many large studies have implemented wrist or thigh accelerometry to capture  
9 physical activity, but the accuracy of these measurements to infer Activity Energy  
10 Expenditure (AEE) and consequently Total Energy Expenditure (TEE) has not been  
11 demonstrated. The purpose of this study was to assess the validity of acceleration intensity at  
12 wrist and thigh sites as estimates of AEE and TEE under free-living conditions using a gold-  
13 standard criterion.

14 Methods: Measurements for 193 UK adults (105 men, 88 women, aged 40-66 years, BMI  
15  $20.4\text{-}36.6\text{ kg}\cdot\text{m}^{-2}$ ) were collected with triaxial accelerometers worn on the dominant wrist,  
16 non-dominant wrist and thigh in free-living conditions for 9-14 days. In a subsample (50 men,  
17 50 women) TEE was simultaneously assessed with doubly labelled water (DLW). AEE was  
18 estimated from non-dominant wrist using an established estimation model, and novel models  
19 were derived for dominant wrist and thigh in the non-DLW subsample. Agreement with both  
20 AEE and TEE from DLW was evaluated by mean bias, Root Mean Squared Error (RMSE)  
21 and Pearson correlation.

22 Results: Mean TEE and AEE derived from DLW was  $11.6\text{ (}2.3\text{) MJ}\cdot\text{day}^{-1}$  and  $49.8\text{ (}16.3\text{)}$   
23  $\text{kJ}\cdot\text{day}^{-1}\cdot\text{kg}^{-1}$ . Dominant and non-dominant wrist acceleration were highly correlated in free-  
24 living ( $r=0.93$ ), but less so with thigh ( $r=0.73$  and  $0.66$ , respectively). Estimates of AEE were  
25  $48.6\text{ (}11.8\text{) kJ}\cdot\text{day}^{-1}\cdot\text{kg}^{-1}$  from dominant wrist,  $48.6\text{ (}12.3\text{)}$  from non-dominant wrist, and  $46.0$   
26  $\text{(}10.1\text{)}$  from thigh; these agreed strongly with AEE (RMSE  $\sim 12.2\text{ kJ}\cdot\text{day}^{-1}\cdot\text{kg}^{-1}$ ,  $r\sim 0.71$ ) with  
27 small mean biases at the population level ( $\sim 6\%$ ). Only the thigh estimate bias was statistically  
28 significantly different from the criterion. When combining these AEE estimates with  
29 estimated REE, agreement was stronger with the criterion (RMSE  $\sim 1.0\text{ MJ}\cdot\text{day}^{-1}$ ,  $r\sim 0.90$ ).

30 Conclusions: In UK adults, acceleration measured at either wrist or thigh can be used to  
31 estimate population levels of AEE and TEE in free-living conditions with high precision.

32 Keywords: physical activity; wrist acceleration; wrist-worn sensor; thigh-worn; isotope;

33 bioenergetics; validation; energy balance

34

35

## 36 **Introduction**

37 Characterising the energy balance of individuals in free-living conditions requires an accurate  
38 assessment of total energy expenditure. Total energy expenditure can be measured with high  
39 precision using the doubly labelled water technique<sup>1</sup> but this is an expensive undertaking that  
40 requires elaborate sample collection and analysis infrastructure, making it less feasible for  
41 large-scale deployment or application in clinical settings. In most people, the largest  
42 component of total energy expenditure is resting energy expenditure, which can be predicted  
43 from anthropometric information with reasonable accuracy<sup>2,3</sup>. Diet-induced thermogenesis is  
44 less variable and ordinarily constitutes approximately 10% of total energy expenditure<sup>4</sup>. The  
45 predominant source of uncertainty in total energy expenditure estimates is the highly-variable  
46 activity energy expenditure component, which has proven difficult to capture by subjective  
47 instruments such as questionnaires<sup>5,6</sup>. Body-worn sensors such as accelerometers have the  
48 potential to provide a relatively cheap and reliable solution to this problem<sup>7</sup>, if valid inference  
49 models can be devised to estimate activity energy expenditure from the measurements they  
50 record.

51 In recent years, wrist-worn accelerometers have become a popular measurement modality for  
52 objectively capturing free-living physical activity in large-scale studies<sup>8-10</sup>. Devices worn on  
53 the wrist are generally considered to be less burdensome for participants than those worn on  
54 other anatomical sites<sup>11</sup>. This has led to improved wear protocol adherence and thus to  
55 measurements with potentially greater representation of habitual physical activity levels.  
56 However, despite their recent increase in popularity, their utility in the estimation of activity  
57 energy expenditure has yet to be tested against gold-standard techniques in a sufficiently  
58 large sample of men and women in free-living<sup>12</sup>. Furthermore, some large studies<sup>8-10</sup> have  
59 committed to measuring only one of either the dominant wrist or non-dominant wrist, and the  
60 relationship between these two measurements also remains understudied.

61 In previous work, we derived parametric models to estimate activity energy expenditure  
62 intensity from non-dominant wrist acceleration (reproduced in Table 2) using a dataset  
63 (n=1050) of simultaneous non-dominant wrist and individually-calibrated combined heart  
64 rate and movement sensing signals collected under free-living conditions<sup>13</sup>. We evaluated the  
65 models in a large holdout sample (n=645) and found that they explained 44-47% of the  
66 variance in activity energy expenditure with no significant mean bias at the population level.  
67 However, as this comparison was against a silver-standard measurement of activity volume,  
68 these estimation models could be more conclusively validated by integrating the estimated  
69 activity energy expenditure signal over time, and assessing agreement of activity volume with  
70 a gold-standard criterion such as doubly labelled water. This approach has been used to  
71 validate combined heart rate and movement sensing<sup>14-16</sup> against which the models were  
72 originally derived.

73 Thigh-worn devices have typically been employed in smaller studies to measure time spent in  
74 a sitting posture, in order to infer sedentary time. This is possible because the distribution of  
75 gravity over the three axes can be interpreted using a simple equation to calculate thigh  
76 inclination. However, thigh acceleration has received comparatively little attention as a  
77 measure of physical activity intensity, though it features prominently in activity classification  
78 experiments<sup>17</sup>. In epidemiological settings, thigh-worn sensors have been complemented by  
79 other sensors with the intention to capture physical activity separately<sup>18</sup>.

80 The primary aim of this study was to describe the absolute validity of a previously  
81 established activity energy expenditure prediction model<sup>13</sup> when applied to both wrists, and  
82 to evaluate the validity of this estimation in predicting total energy expenditure when  
83 combined with a simple anthropometric prediction of resting energy expenditure<sup>2</sup>. The  
84 second aim was to use the same approach to derive and validate similar energy expenditure  
85 estimation models using thigh acceleration. The third aim was to explore the relationship

86 between the dominant wrist, non-dominant wrist and thigh acceleration measures in free-  
87 living, and to derive intensity models to facilitate harmonisation.

## 88 **Subjects and Methods**

89 Participants were recruited from the Fenland study, an ongoing cohort described in detail  
90 elsewhere <sup>19</sup>. We aimed to recruit participants who had previously indicated that they were  
91 interested in participating in future studies, were aged between 40 and 70 years, with a BMI  
92 between 20 and 50 kg·m<sup>-2</sup>. Recruitment aimed to balance age, sex and BMI distributions.  
93 Participants were invited to attend an assessment centre on two separate occasions, separated  
94 by a free-living period of 9 to 14 days. Ethical approval for the study was obtained from  
95 Cambridge University Human Biology Research Ethics Committee (Ref: HBREC/2015.16).  
96 All participants provided written informed consent.  
97 Weight was measured to the nearest 0.1 kg using calibrated digital scales (TANITA model  
98 BC-418 MA; Tanita, Tokyo, Japan) at both visits. Height was measured to the nearest 0.1 cm  
99 using a stadiometer (SECA 240; Seca, Birmingham, UK) at the first clinic visit. Body  
100 composition was also measured by DXA (Lunar Prodigy Advanced, GE Healthcare, USA) as  
101 part of the Fenland study.  
102 Total energy expenditure was measured by doubly labelled water in 100 of the participants.  
103 Prior to the first clinic visit, participants self-reported their current weight, which was used to  
104 provide a body-weight specific dose of <sup>2</sup>H<sub>2</sub><sup>18</sup>O (70 mg <sup>2</sup>H<sub>2</sub>O and 174 mg H<sub>2</sub><sup>18</sup>O per kg body  
105 weight). Participants brought a baseline urine sample to their first clinic visit, and a second  
106 baseline sample was taken at the clinic visit, prior to dosing. Participants were provided  
107 labelled sampling bottles and asked to collect one urine sample per day for the next 9-10 days,  
108 at a similar time each day but not the first void of the day. Participants were asked to record  
109 the date and time of each measurement on the sample bottle label and separately on a  
110 provided timesheet. Participants were asked to store the samples in a container in a cool, dry  
111 place, such as a refrigerator, and to return those samples at their second clinic visit at the end  
112 of their free-living measurement period. Isotope ratio mass spectrometry (<sup>2</sup>H, Isoprime, GV

113 Instruments, Wythenshaw, Manchester, UK and  $^{18}\text{O}$ , AP2003, Analytical Precision Ltd,  
114 Northwich, Cheshire, UK) was used to measure the isotopic enrichment of the samples. All  
115 samples were measured alongside laboratory reference standards, previously calibrated  
116 against the international standards Vienna-Standard Mean Ocean Water (vSMOW) and  
117 Vienna-Standard Light Antarctic Precipitate (vSLAP) (International Atomic Energy Agency,  
118 Vienna, Austria). Sample enrichments were corrected for interference according to Craig <sup>20</sup>  
119 and expressed relative to vSMOW. Rate constants and pool sizes were calculated from the  
120 slopes and intercepts of the log-transformed data, with total  $\text{CO}_2$  production ( $\text{RCO}_2$ )  
121 calculated using the multi-point method of Schoeller <sup>21</sup>.  $\text{RCO}_2$  was converted to total energy  
122 expenditure <sup>22</sup> where the respiratory quotient was informed by the macronutrient composition  
123 of the diet (see below).

124 Resting metabolic rate was measured at the start of both clinic visits during a fifteen-minute  
125 rest test by respired gas analysis (OxyconPro, Jaeger, Germany). A seven-breath running  
126 median was calculated and the lowest observed average rate over a five minute consecutive  
127 window was found, which was scaled down by 6% to compensate for within-day elevation of  
128 resting metabolic rates <sup>23</sup>. Basal metabolic rate was also estimated via three different  
129 equations which differ in the specific body composition information utilised <sup>2,24,25</sup>. Resting  
130 energy expenditure was primarily characterised as the nearest measured value to the mean  
131 average estimated value, and a further sensitivity analysis was conducted using exclusively  
132 measured values. The final 24-hour resting energy expenditure estimates also included an  
133 adjustment for a 5% lower metabolic rate during sleep <sup>26</sup>, according to their reported mean  
134 sleep duration.

135 At the second clinic visit, participants were asked to complete a Food Frequency  
136 Questionnaire <sup>27</sup>, which was used to estimate dietary intake over the past year. The food  
137 frequency data was processed using FETA <sup>28</sup>, and the resulting calorie-weighted



138 macronutrient profile was used to calculate the Food Quotient and diet-induced  
139 thermogenesis<sup>29</sup>. Diet-induced thermogenesis was normalised by the total energy expenditure  
140 to total energy intake ratio, as done previously<sup>14</sup>.

141 At the first clinic visit, participants were fitted with three waterproof triaxial accelerometers  
142 (AX3, Axivity, Newcastle upon Tyne, UK); one device was attached to each wrist with a  
143 standard wristband, and one was attached to the anterior midline of the right thigh using a  
144 medical-grade adhesive dressing. The devices were setup to record raw, triaxial acceleration  
145 at 100 Hz with a dynamic range of  $\pm 8$  g (where g refers to the local gravitational force,  
146 roughly equal to  $9.81 \text{ m}\cdot\text{s}^{-2}$ ). Participants were asked to wear them continuously for the  
147 following 8 days and nights whilst continuing with their usual activities. They were also  
148 asked to record their main sleep using a sleep diary throughout the free-living period.

149 The signals were resampled from their original irregularly timestamped intervals to a uniform  
150 100 Hertz signal by linear interpolation, and then calibrated to local gravity using a well-  
151 established technique<sup>30,31</sup>, without adjustment for temperature changes within the record.

152 Periods of nonwear were identified as windows of an hour or more wherein the device was  
153 inferred to be completely stationary<sup>11</sup>, where stationary is defined as standard deviation in  
154 each axis not exceeding the approximate baseline noise of the device itself (10 milli-g).

155 Vector Magnitude (VM) was then calculated from the three axes ( $\text{VM}(X,Y,Z) = (X^2 + Y^2 +$   
156  $Z^2)^{0.5}$ ), from which two acceleration intensity metrics were derived<sup>32</sup>; Euclidean Norm Minus  
157 One (ENMO) subtracts 1 g from VM and truncates any negative results to 0, and High-Pass  
158 Filtered Vector Magnitude (HPFVM) applies a fourth-order high-pass filter to the signal at a  
159 0.2 Hertz cut-off (3 dB). These analyses were performed using pampro v0.4.0<sup>33</sup>.

160 In the non-doubly labelled water group (n=93), multi-level linear regression with random  
161 effects at the participant level was used to characterise each of the pairwise relationships  
162 between dominant wrist, non-dominant wrist and thigh acceleration intensity using

163 synchronised 5-minute level data from each source. We used these intensity relationships to  
164 derive new activity energy expenditure estimation models for thigh and dominant wrist-worn  
165 devices, by substituting the non-dominant wrist term in our original models with the derived  
166 equation to harmonise either dominant wrist or thigh acceleration to non-dominant wrist  
167 acceleration.

168 Activity energy expenditure was estimated separately from each of the acceleration signals by  
169 directly applying the appropriate linear and quadratic equations given in Table 2 to 5-second  
170 level data; the resulting 5-second level estimated activity energy expenditure signal was then  
171 summarised to a mean-per-day average activity energy expenditure using diurnal adjustment  
172 to compensate for any between-individual bias introduced by periods of nonwear<sup>34</sup>. To ensure  
173 a stable estimate of this circadian model, a minimum of 72 hours of valid data was required  
174 per signal to be included in the analyses. Predicted total energy expenditure (in MJ-day<sup>-1</sup>) was  
175 calculated as the sum of predicted activity energy expenditure and predicted resting energy  
176 expenditure from the simplest model (using only age, sex, height and weight)<sup>2</sup>, and dividing  
177 the result by 0.9 to account for diet-induced thermogenesis<sup>4</sup>. Agreement between these two  
178 predictions against measured activity energy expenditure and total energy expenditure from  
179 doubly labelled water was formally tested by calculating the pairwise mean bias and 95%  
180 limits of agreement, Root Mean Squared Error (RMSE) and Pearson's correlation coefficient.  
181 Linear regression was used to characterise the relationship between the acceleration  
182 measurements and activity energy expenditure/total energy expenditure derived from doubly  
183 labelled water. As the main focus of this paper is on absolute validity, these relative validity  
184 results are supplied in the supplementary material.

185 The statistical tests were performed using Python v3.6 and Stata v14 (StataCorp, TX, USA).

186

187 **Results**

188 A descriptive summary of participant characteristics is given in Table 1. We recruited 193  
189 participants, and the group measured by doubly labelled water was split equally between men  
190 and women. According to the doubly labelled water measurements, mean (standard deviation)  
191 total energy expenditure was 11.6 (2.3) MJ·day<sup>-1</sup>, of which 6.6 (1.2) MJ·day<sup>-1</sup> was resting  
192 energy expenditure. Mean (standard deviation) activity-related acceleration (ENMO) per day  
193 was 32.4 (8.3) milli-g on the dominant wrist, 28.8 (7.7) milli-g on the non-dominant wrist,  
194 and 27.8 (10.9) milli-g on the thigh. Mean dominant wrist acceleration was higher than non-  
195 dominant wrist in 84% of participants.

196 Some accelerometry measurements were not included in the analyses due to a combination of  
197 devices being lost by participants (n=7), device failures (n=3), user error upon download  
198 (n=3), and insufficient wear time (n=3). Of those files that overlapped with doubly labelled  
199 water measurements, 3 were dominant wrist records, 3 were non-dominant wrist and 9 were  
200 thigh records. There was no loss of data in the doubly labelled water, anthropometry or food  
201 frequency questionnaire measurements.

202 Table 2 lists the derived equations to predict activity energy expenditure from each of the  
203 sensors, as informed by the harmonisation equations which are supplied in Supplementary  
204 Table 1. For brevity, Table 3 summarises the absolute validity of the quadratic HPFVM  
205 models applied to measurements from both wrists and thigh with respect to activity energy  
206 expenditure, and Table 3 summarises agreement with total energy expenditure derived from  
207 doubly labelled water. A Bland-Altman plot illustrating the agreement of these estimates is  
208 supplied in Figure 1. A table summarising the remaining models is given in Supplementary  
209 Table 2.

210 The difference in performance between each estimation model was very minor; all activity  
211 energy expenditure estimates had small negative mean biases (underestimates) at the

212 population level (average  $-2.8 \text{ kJ}\cdot\text{day}^{-1}\cdot\text{kg}^{-1}$ ) but of these only the thigh model biases were  
213 statistically significant. RMSEs for activity energy expenditure ranged from 11.9 to 13.5  
214  $\text{kJ}\cdot\text{day}^{-1}\cdot\text{kg}^{-1}$  (24 to 27% of the mean), and 1.0 to 1.2  $\text{MJ}\cdot\text{day}^{-1}$  for total energy expenditure (8  
215 to 10% of the mean). Pearson correlations ranged from 0.6 to 0.69 with activity energy  
216 expenditure, and from 0.87 to 0.91 with total energy expenditure. Combined estimates using  
217 two or more sensors lead to very negligible performance improvements over single-sensor  
218 estimates. Signed estimation errors were nominally positively correlated with body fat  
219 percentage when using our primary characterisation of resting energy expenditure ( $r=0.18$ -  
220  $0.25$ ), and less so with exclusively measured values ( $r=0.10$ - $0.17$ ).

221 In the non-doubly labelled water group, 88 participants had at least 3 days of valid  
222 simultaneous wrist signals during free-living, and 84 had simultaneous wrist and thigh signals;  
223 around 200 000 5-minute observations included in each of the regression analyses. The  
224 between-individual explained variance between dominant and non-dominant wrist intensity  
225 signals was approximately 86% (99% within-individual), and the average between-individual  
226 explained variance between wrist and thigh intensities was approximately 49% (97% within-  
227 individual). The derived linear models to harmonise the acceleration signals are listed in  
228 Supplementary Table 1. The final models given to estimate activity energy expenditure from  
229 dominant wrist and thigh in Table 2 were the result of substituting these harmonisation  
230 equations into the original non-dominant wrist models.

231

232

233 **Discussion**

234 In this work, we have applied our previously derived activity intensity estimation models<sup>13</sup> to  
235 wrist acceleration signals (after harmonising the intensity of dominant wrist to non-dominant  
236 wrist) and investigated their agreement with a gold-standard measure of activity energy  
237 expenditure. We arrived at estimates that were highly correlated with the criterion ( $r > 0.6$ )  
238 with small and non-significant mean biases at the population level from both wrists and low  
239 RMSEs of approximately  $12 \text{ kJ}\cdot\text{day}^{-1}\cdot\text{kg}^{-1}$ . We have also introduced and validated new  
240 intensity estimation models for thigh acceleration, demonstrating similar performance to the  
241 wrist models. We observed that dominant wrist acceleration was on average 12% higher than  
242 non-dominant wrist in free-living individuals, but that those measures were very highly  
243 correlated ( $r=0.93$ ), allowing us to derive conversion models which harmonise acceleration  
244 intensity measured at either wrist. To our knowledge, this is the first demonstration of the  
245 absolute validity of a time-integrated predictive model of activity intensity for either wrist or  
246 thigh accelerometry.

247 Our findings on the high correlation between dominant wrist and non-dominant wrist  
248 acceleration in free-living individuals are consistent with a previous study in a small  
249 convenience sample ( $n=40$ )<sup>35</sup>. They also observed ~5% higher dominant wrist than non-  
250 dominant wrist acceleration, but it was not a statistically significant difference, perhaps due  
251 to the shorter duration of measurement and smaller sample size. In our relative validity tests,  
252 we found that each wrist separately explained a similar variance in activity energy  
253 expenditure, and inclusion of both wrist measurements in the linear models did not drastically  
254 improve performance over either wrist measurement alone. Taken together, these results are  
255 indicative of a high degree of upper-body symmetry. One implication of these findings is that  
256 irrespective of hand dominance, wrist acceleration measurements are naturally conducive to  
257 harmonisation across studies, making them well suited to pooled- and meta-analysis.

258 Conversely, it implies that implementing dual wrist measurements may be a largely redundant  
259 exercise for studies whose primary intention is to capture activity energy expenditure.

260 However, there is a possibility that future methodological advances in the field of activity  
261 recognition may be able to better utilise simultaneous wrist signals, which could yield a more  
262 precise instantaneous estimation of activity energy expenditure.

263 The estimation models validated herein for the wrist were derived using a training dataset in  
264 which non-dominant wrist acceleration data was collected at 60 Hz with a GeneActiv device  
265 <sup>13</sup>, and were successfully validated using 100 Hz data collected with an Axivity AX3. With an  
266 additional harmonisation step, the model also translated to acceptably strong inferences on  
267 the dominant wrist, albeit with a slightly increased error. This indicates that our models  
268 capture a generalized biomechanical relationship of wrist movement, rather than being  
269 superficial transformations of a specific device's output to activity energy expenditure. It  
270 therefore suggests that these models are applicable to any wrist-worn device which provides  
271 raw, unfiltered triaxial acceleration data expressed in SI units.

272 The associations between wrist acceleration and observations from DLW have been reported  
273 before, in pregnant and non-pregnant Swedish women <sup>11</sup>. In that population it explained 27%  
274 of the variance in activity energy expenditure ( $\text{kJ}\cdot\text{day}^{-1}\cdot\text{kg}^{-1}$ ) in non-pregnant women ( $n=48$ ),  
275 but only 5% in pregnant women ( $n=26$ ); however, those wrist measurements were evenly  
276 divided between left and right wrist, which most likely lead to a mix of dominant and non-  
277 dominant wrist measurements and potentially attenuated the correlations.

278 The previously established estimation models applied to the non-dominant wrist resulted in  
279 robust estimates with small, non-significant mean biases, which is a strong justification for  
280 using this inference scheme to infer activity energy expenditure in free-living individuals.

281 The higher average of the dominant wrist would have led to a significant overestimation had  
282 we applied the original non-dominant wrist model, but our harmonisation approach

283 effectively scaled the dominant wrist measure down to the level of non-dominant wrist,  
284 ultimately leading to virtually identical results. We note that physical activity was measured  
285 by dominant wrist accelerometry in UK Biobank<sup>8</sup>. We have now demonstrated the validity of  
286 this approach in a demographically comparable sample. Specifically, the absolute validity  
287 result for ENMO in Supplementary Table 2 demonstrates that our linear estimation model  
288 applied to ENMO at 5-second resolution yielded a valid activity energy expenditure estimate,  
289 with a small mean bias and a RMSE of  $13 \text{ kJ}\cdot\text{day}^{-1}\cdot\text{kg}^{-1}$  and high correlation ( $r=0.61$ ).  
290 Consequently, we can use the equations for dominant wrist in Table 2 to solve for salient  
291 energy expenditure values – for example, 3 metabolic equivalents (activity energy  
292 expenditure  $\sim 142 \text{ J}\cdot\text{min}^{-1}\cdot\text{kg}^{-1}$ ) is the generally accepted threshold for “moderate” activity  
293 intensity, and our ENMO equations suggest this is approximately 159 milli-g on the dominant  
294 wrist.

295 Our findings for the thigh acceleration models demonstrate that thigh-worn accelerometers  
296 capture an information-rich biomechanical signal, from which valid estimates of activity  
297 energy expenditure can be made. As a consequence of the larger y-intercepts of the thigh  
298 models, their minimum estimated activity energy expenditure ranges from 10 to  $18 \text{ J}\cdot\text{min}^{-1}\cdot\text{kg}^{-1}$   
299 ( $0.15\text{-}0.25$  metabolic equivalents). To our knowledge, only one previous study has  
300 described the association between thigh acceleration and activity energy expenditure from  
301 doubly labelled water, in a small study of free-living cancer patients and controls<sup>36</sup>; which  
302 reported very low agreement between the manufacturer's proprietary activity energy  
303 expenditure prediction and the criterion. While thigh-worn sensors do not yet have the same  
304 popularity as wrist-worn sensors<sup>37,38</sup>, large-scale data collections are planned for the future<sup>39</sup>.

305 Our models enable new analyses to be conducted in those existing datasets, and may make  
306 thigh-worn accelerometry a more appealing option for future studies if issues of feasibility  
307 can be addressed.

308 Some have suggested that simple movement intensity approaches should be replaced by more  
309 sophisticated models that utilise a broader range of signal features<sup>40,41</sup>. Recent efforts to  
310 estimate energy expenditure have utilised a range of machine learning approaches, such as  
311 neural networks<sup>42-44</sup> and random forests<sup>40</sup>. While we are not aware of any such methodology  
312 with a performance that exceeds the simpler models validated in this paper, this is an  
313 interesting area of future work.

314 The results of our absolute validity tests demonstrate that deriving intensity models using a  
315 "silver-standard" criterion (such as individually-calibrated heart rate and uniaxial movement  
316 sensing) in a large sample of free-living adults is a sound approach. The combined sensing  
317 estimate of activity energy expenditure is less precise than respiratory gas analysis which can  
318 be captured in laboratory studies<sup>45</sup> but there are several reasons why we have been able to  
319 derive superior models to previous approaches. Firstly, the dataset was collected in free-living  
320 participants, and is therefore representative of the intended application, as opposed to  
321 artificial scenarios and activities performed in a laboratory. Secondly, the combined sensing  
322 approach embedded in a cohort study allowed the collection of a volume of data many orders  
323 of magnitude greater than any laboratory study has for this purpose. Our training dataset  
324 alone contained over 16.6 person-years of observation (>1.7 million data points). One  
325 disadvantage of this approach is that we are unable to capture categorical labelled data, so  
326 there is no opportunity to explore activity type recognition.

327 It is appropriate to compare our absolute validity results here with those of combined sensing  
328 itself<sup>14</sup>. The best estimate with treadmill test calibration resulted in a RMSE of 20 kJ·day<sup>-1</sup>·kg<sup>-1</sup>  
329 (30% of the 66 kJ·day<sup>-1</sup>·kg<sup>-1</sup> criterion mean), non-significant positive mean bias of  
330 approximately 4 kJ·day<sup>-1</sup>·kg<sup>-1</sup> (6%) at the population level, and a correlation of 0.67 in a  
331 sample of 50 UK adults. Compared to the present results, all estimations here had  
332 considerably lower RMSEs of around 12 kJ·day<sup>-1</sup>·kg<sup>-1</sup> (25% of the 50 kJ·day<sup>-1</sup>·kg<sup>-1</sup> mean),



333 similar magnitude but negative mean biases (~6%), but generally higher correlations.  
334 However, our study participants were significantly less active overall according to the  
335 criterion, ultimately leading to a similar relative accuracy. Combined sensing model errors  
336 were also uncorrelated to body fat percentage, whereas errors of accelerometry-only models  
337 seem to display this characteristic, albeit less so in the present study ( $r=0.22$  versus  $r=0.63$  for  
338 uniaxial trunk acceleration). Contrasting the feasibility of the methods, however, wrist  
339 accelerometry has the advantages of being cheaper, less burdensome to both participants and  
340 research staff, and does not require individual calibration using an exercise test. Comparing  
341 performance of other devices worn on the upper limbs, validation of the now-discontinued  
342 SenseWear Pro3 and Mini also achieved no significant bias with respect to total energy  
343 expenditure, but with lower correlations ( $r=0.84$ ) than any of our total energy expenditure  
344 models ( $r=0.9$ ) and wider limits of agreement<sup>46</sup> and with lower feasibility.  
345 In summary, we have evaluated the absolute validity of intensity models of activity energy  
346 expenditure from wrist and thigh accelerometry, and concluded that they provide precise and  
347 accurate estimates in free-living adults. With the addition of predicted resting energy  
348 expenditure to produce total energy expenditure, we found even stronger validity at the  
349 population level. Considering its feasibility, wrist accelerometry emerges as a viable  
350 candidate for deployment in a large scale studies, including physical activity surveillance and  
351 the prediction of total energy expenditure in dietary surveys.

352

353

354 **Acknowledgements**

355 We are very grateful to the participants who took part in this study. We thank the principal  
356 investigators of the Fenland study for allowing us to recruit from this study population, and  
357 the functional teams of the MRC Epidemiology Unit (Study Coordination, Field  
358 Epidemiology, Anthropometry, Data Management, IT) for supporting the study. We would  
359 like to specifically acknowledge Lewis Griffiths, Katie Palmer, and Eoin McNamara for their  
360 assistance in the data collection for this study, and Annie Schiff, Richard Salisbury and  
361 Nicola Kimber for study co-ordination and recruitment.

362 We would like to thank Eirini Trichia from the MRC Epidemiology Unit for processing the  
363 FFQ data with the FETA package. We would also like to thank the stable isotope team from  
364 the MRC Elsie Widdowson Laboratory: Priya Singh, Elise Orford and Kevin Donkers for the  
365 DLW preparation and analysis.

366 Medical Research Council and UK Biobank are acknowledged for covering costs of the  
367 fieldwork. Newcastle University and MedImmune are acknowledged for covering the costs of  
368 the doubly labelled water measurements.

369

370

371

372

373 **Competing interests**

374 Patrick Olivier was a founding director of Axivity Ltd. (2011-2014); his spouse is currently

375 CEO and a director of Axivity (from 2014). The remaining authors declare no conflict of

376 interest.

377

378 **References**

- 379 1 Schoeller DA, Ravussin E, Schutz Y, Acheson KJ, Baertschi P, Jequier E *et al.* Energy  
380 expenditure by doubly labeled water: validation in humans and proposed calculation.  
381 *Am J Physiol - Regul Integr Comp Physiol* 1986; **250**: R823–R830.
- 382 2 Henry CJ. Basal metabolic rate studies in humans: measurement and development of  
383 new equations. *Public Heal Nutr* 2005; **8**: 1133–1152.
- 384 3 Sabounchi NS, Rahmandad H, Ammerman A. Best-fitting prediction equations for  
385 basal metabolic rate: informing obesity interventions in diverse populations. *Int J Obes*  
386 2013; **37**: 1364–1370.
- 387 4 Westerterp KR, Jonge L de, Bray G, Granata G, Brandon L, Weststrate J *et al.* Diet  
388 induced thermogenesis. *Nutr Metab (Lond)* 2004; **1**: 5.
- 389 5 Maddison, Ralph, Mhurchu CN, Jiang Y, Hoorn S Vander, Rodgers A *et al.*  
390 International Physical Activity Questionnaire (IPAQ) and New Zealand Physical  
391 Activity Questionnaire (NZPAQ): A doubly labelled water validation. *Int J Behav Nutr*  
392 *Phys Act* 2007; **4**: 61–71.
- 393 6 Golubic R, May AM, Benjaminsen Borch K, Overvad K, Charles MA, Diaz MJT *et al.*  
394 Validity of electronically administered Recent Physical Activity Questionnaire (RPAQ)  
395 in ten European countries. *PLoS One* 2014; **9**. doi:10.1371/journal.pone.0092829.
- 396 7 Plasqui G, Bonomi AG, Westerterp KR. Daily physical activity assessment with  
397 accelerometers: New insights and validation studies. *Obes Rev* 2013; **14**: 451–462.
- 398 8 Doherty A, Jackson D, Hammerla N, Ploetz T, Granat MH, White T *et al.* Large Scale  
399 Population Assessment of Physical Activity Using Wrist Worn Accelerometers □: The  
400 UK Biobank Study. *PLoS One* 2017; : 1–14.
- 401 9 da Silva ICM, van Hees VT, Ramires V V, Knuth AG, Bielemann RM, Ekelund U *et al.*  
402 Physical activity levels in three Brazilian birth cohorts as assessed with raw triaxial

- 403 wrist accelerometry. *Int J Epidemiol* 2014; **43**: 1959–1968.
- 404 10 Troiano R, Mc Clain J. Objective measures of physical activity, sleep, and strength in  
405 US National Health and Nutrition Examination Survey (NHANES) 2011–2014. In:  
406 *Proceedings of the 8th International Conference on Diet and Activity Methods*. 2012.
- 407 11 van Hees VT, Renström F, Wright A, Gradmark A, Catt M, Chen KY *et al*. Estimation  
408 of daily energy expenditure in pregnant and non-pregnant women using a wrist-worn  
409 tri-axial accelerometer. *PLoS One* 2011; **6**: e22922.
- 410 12 Plasqui G, Bonomi Ag, Westerterp KR. Daily physical activity assessment with  
411 accelerometers: new insights and validation studies. *Obes Rev* 2013; **14**: 451–462.
- 412 13 White T, Westgate K, Wareham NJ, Brage S. Estimation of physical activity energy  
413 expenditure during free-living from wrist accelerometry in UK adults. *PLoS One* 2016;  
414 **11**. doi:10.1371/journal.pone.0167472.
- 415 14 Brage S, Westgate K, Franks PW, Stegle O, Wright A, Ekelund U *et al*. Estimation of  
416 Free-Living Energy Expenditure by Heart Rate and Movement Sensing: A Doubly-  
417 Labelled Water Study. *PLoS One* 2015; **10**: e0137206.
- 418 15 Villars C, Bergouignan A, Dugas J, Antoun E, Schoeller DA, Roth H *et al*. Validity of  
419 combining heart rate and uniaxial acceleration to measure free-living physical activity  
420 energy expenditure in young men. *J Appl Physiol* 2012; **113**: 1763–1771.
- 421 16 Assah FK, Ekelund U, Brage S, Wright A, Mbanya JC, Wareham NJ. Accuracy and  
422 validity of a combined heart rate and motion sensor for the measurement of free-living  
423 physical activity energy expenditure in adults in Cameroon. *Int J Epidemiol* 2011; **40**:  
424 112–20.
- 425 17 Bao L, Intille SS. Activity Recognition from User-Annotated Acceleration Data. 2004; :  
426 1–17.
- 427 18 Healy GN, Wijndaele K, Dunstan DW, Shaw JE, Salmon J, Zimmet PZ *et al*.

- 428 Objectively measured sedentary time, physical activity, and metabolic risk the  
429 Australian Diabetes, Obesity and Lifestyle Study (AusDiab). *Diabetes Care* 2008; **31**:  
430 369–371.
- 431 19 O'Connor L, Brage S, Griffin SJ, Wareham NJ, Forouhi NG. The cross-sectional  
432 association between snacking behaviour and measures of adiposity: the Fenland Study,  
433 UK. *Br J Nutr* 2015; **114**: 1286–1293.
- 434 20 Craig H. Isotopic standards for carbon and oxygen and correction factors for mass-  
435 spectrometric analysis of carbon dioxide. *Geochim Cosmochim Acta* 1957; **12**: 133–  
436 149.
- 437 21 Schoeller DA. Recent Advances in Nutritional Sciences Recent Advances from  
438 Application of Doubly Labeled Water to Measurement of Human Energy. 1998; :  
439 1765–1768.
- 440 22 Elia, M and Livesey G. Theory and validity of indirect calorimetry during net lipid  
441 synthesis. *Am J Clin Nutr* 1988; **47**: 591--607.
- 442 23 Haugen H a, Melanson EL, Tran ZV, Kearney JT, Hill JO. Variability of measured  
443 resting metabolic rate. *Am J Clin Nutr* 2003; : 1141–1144.
- 444 24 Nielsen S, Hensrud DD, Romanski S, Levine J a, Burguera B, Jensen MD. Body  
445 composition and resting energy expenditure in humans: role of fat, fat-free mass and  
446 extracellular fluid. *Int J Obes Relat Metab Disord* 2000; **24**: 1153–1157.
- 447 25 Watson LPE, Raymond-Barker P, Moran C, Schoenmakers N, Mitchell C, Bluck L *et*  
448 *al.* An approach to quantifying abnormalities in energy expenditure and lean mass in  
449 metabolic disease. *Eur J Clin Nutr* 2014; **68**: 234–240.
- 450 26 Ainsworth BE, Haskell WL, Herrmann SD, Meckes N, Bassett DR, Tudor-Locke C *et*  
451 *al.* 2011 Compendium of Physical Activities: a second update of codes and MET  
452 values. *Med Sci Sports Exerc* 2011; **43**: 1575—1581.

- 453 27 Bingham S, Gill C, Welch A, Cassidy A, Runswick S, Oakes S *et al.* Validation of  
454 dietary assessment methods in the UK arm of EPIC using weighed records, and 24-  
455 hour urinary nitrogen and potassium and serum vitamin C and carotenoids as  
456 biomarkers. *Int J Epidemiol* 1997; **26 Suppl 1**: S137–S151.
- 457 28 Mulligan AA, Luben RN, Bhaniani A, Parry-Smith DJ, O'Connor L, Khawaja AP *et al.*  
458 A new tool for converting food frequency questionnaire data into nutrient and food  
459 group values: FETA research methods and availability. *BMJ Open* 2014; **4**: e004503.
- 460 29 Jequier E. Pathways to obesity. *Int J Obes* 2002; **26**: S18–S27.
- 461 30 van Hees VT, Fang Z, Langford J, Assah F, Mohammad A, da Silva ICM *et al.*  
462 Autocalibration of accelerometer data for free-living physical activity assessment  
463 using local gravity and temperature: an evaluation on four continents. *J Appl Physiol*  
464 2014; **117**: 738–44.
- 465 31 Lukowicz P, Junker H, Tröster G. Automatic Calibration of Body Worn Acceleration  
466 Sensors. In: *International Conference on Pervasive Computing*. Springer Berlin  
467 Heidelberg, 2004, pp 176–181.
- 468 32 van Hees VT, Gorzelniak L, Dean León EC, Eder M, Pias M, Taherian S *et al.*  
469 Separating movement and gravity components in an acceleration signal and  
470 implications for the assessment of human daily physical activity. *PLoS One* 2013; **8**:  
471 e61691.
- 472 33 White T. pampro v0.4.0. 2018. doi:<http://doi.org/10.5281/zenodo.1187043>.
- 473 34 Brage S, Westgate K, Wijndaele K, Godinho J, Griffin S, Wareham N. Evaluation of a  
474 method for minimising diurnal information bias in objective sensor data. In: *Int Conf*  
475 *Amb Mon Phys Act Mov*. 2013.
- 476 35 Dieu O, Mikulovic J, Fardy PS, Bui-Xuan G, Béghin L, Vanhelst J. Physical activity  
477 using wrist-worn accelerometers: comparison of dominant and non-dominant wrist.

- 478 *Clin Physiol Funct Imaging* 2016; : n/a-n/a.
- 479 36 Skipworth RJE, Stene GB, Dahele M, Hendry PO, Small AC, Blum D *et al.* Patient-  
480 focused endpoints in advanced cancer: Criterion-based validation of accelerometer-  
481 based activity monitoring. *Clin Nutr* 2011; **30**: 812–821.
- 482 37 Schram MT, Sep SJS, Van Der Kallen CJ, Dagnelie PC, Koster A, Schaper N *et al.* The  
483 Maastricht Study: An extensive phenotyping study on determinants of type 2 diabetes,  
484 its complications and its comorbidities. *Eur J Epidemiol* 2014; **29**: 439–451.
- 485 38 van der Berg JD, Stehouwer CDA, Bosma H, van der Velde JHPM, Willems PJB,  
486 Savelberg HHCM *et al.* Associations of total amount and patterns of sedentary  
487 behaviour with type 2 diabetes and the metabolic syndrome: The Maastricht Study.  
488 *Diabetologia* 2016; **59**: 709–718.
- 489 39 Hessen H-O, Tessem AJ. *Human Activity Recognition with two Body-Worn*  
490 *Accelerometer Sensors*. 2016.<http://hdl.handle.net/11250/2407624>.
- 491 40 Ellis K, Kerr J, Godbole S, Lanckriet G, Wing D, Marshall S. A random forest  
492 classifier for the prediction of energy expenditure and type of physical activity from  
493 wrist and hip accelerometers. *Physio* 2015; **35**: 2191–2203.
- 494 41 Montoye AHK, Begum M, Zachary H, Pfeiffer KA. Comparison of linear and non-  
495 linear models for predicting energy expenditure from raw accelerometer data. *Physiol*  
496 *Meas* 2017; **38**. doi:10.1088/1361-6579/38/2/343.
- 497 42 Montoye AHK, Mudd LM, Biswas S, Pfeiffer KA. Energy Expenditure Prediction  
498 Using Raw Accelerometer Data in Simulated Free-Living. *Med Sci Sport Exerc* 2014.  
499 doi:10.1249/MSS.0000000000000597.
- 500 43 Lyden K, Keadle SK, Staudenmayer J, Freedson PS. A method to estimate free-living  
501 active and sedentary behavior from an accelerometer. *Med Sci Sports Exerc* 2014; **46**:  
502 386.



- 503 44 Montoye AHK, Pivarnik JM, Mudd LM, Biswas S, Pfeiffer KA. Wrist-independent  
504 energy expenditure prediction models from raw accelerometer data. *Physiol Meas*  
505 2016; **37**: 1770–1784.
- 506 45 Brage S, Brage N, Franks PW, Ekelund U, Wong M-Y, Andersen LB *et al.* Branched  
507 equation modeling of simultaneous accelerometry and heart rate monitoring improves  
508 estimate of directly measured physical activity energy expenditure. *J Appl Physiol*  
509 2004; **96**: 343–351.
- 510 46 Johannsen DL, Calabro MA, Stewart J, Franke W, Rood JC, Welk GJ. Accuracy of  
511 armband monitors for measuring daily energy expenditure in healthy adults. *Med Sci*  
512 *Sports Exerc* 2010; **42**: 2134–2140.
- 513
- 514
- 515

516 **Figure legends**

517

518 Participant characteristics, provided separately for the doubly labelled water and non-doubly  
519 labelled water groups.

520 Derived linear and quadratic equations to estimate activity energy expenditure ( $\text{J}\cdot\text{min}^{-1}\cdot\text{kg}^{-1}$ )  
521 from wrist and thigh acceleration intensity. ( $4.184 \text{ J}\cdot\text{min}^{-1}\cdot\text{kg}^{-1} = 1 \text{ cal}$ , and  $71.225 \text{ J}\cdot\text{min}^{-1}\cdot\text{kg}^{-1}$   
522 = 1 net Metabolic Equivalent Task (MET)).

523 Agreement between estimated activity energy expenditure from the HPFVM quadratic  
524 models with those derived from doubly labelled water. An asterisk (\*) next to a bias value  
525 indicates statistical significance according to a paired t-test ( $p < 0.05$ ).

526 Bland-Altman plots illustrating agreement between the activity energy expenditure and total  
527 energy expenditure estimates from HPFVM Quadratic models with those from doubly  
528 labelled water, where the X-axis indicates the observed values.

AEE ( $\text{kJ}\cdot\text{day}^{-1}\cdot\text{kg}^{-1}$ )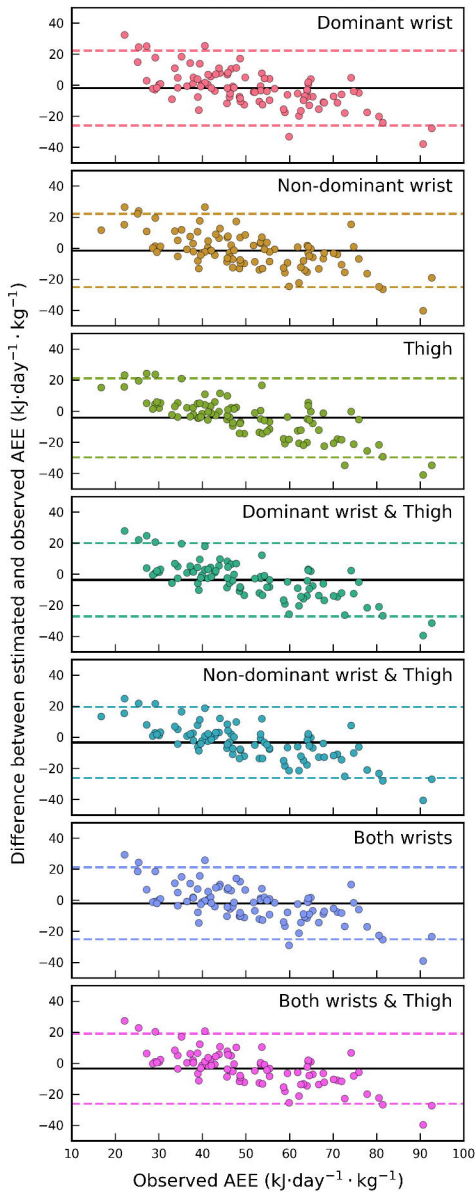TEE ( $\text{MJ}\cdot\text{day}^{-1}$ )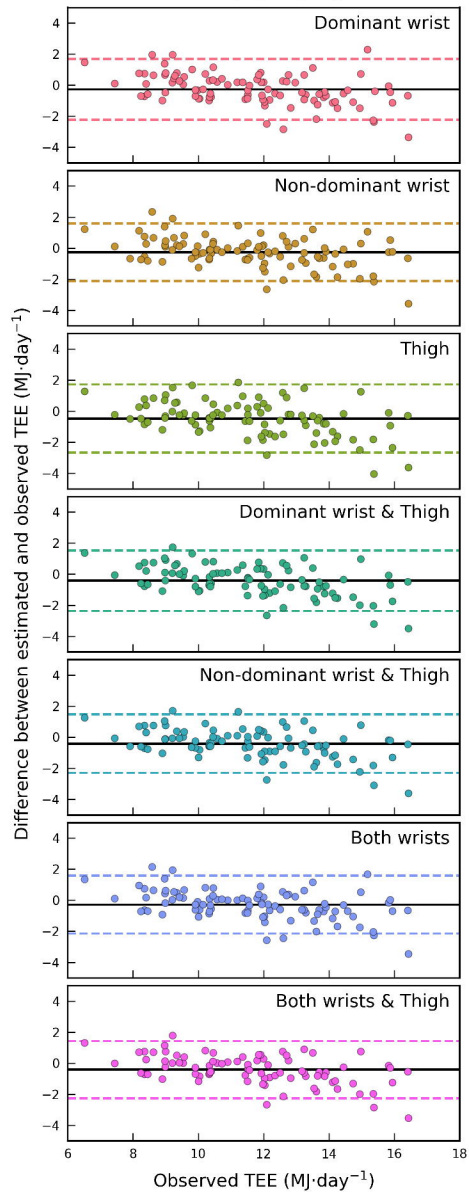

Source: http://biorxiv.org/content/10.1101/370247v1.full.pdf
